# Supplementary material for: Tunable crystallographic grain orientation and Raman fingerprints of polycrystalline SnO thin films
Source: Royal Society of Chemistry journal article supplement (doi:10.1039/c4tc02184c), 2014-11-28
Supplement: c4tc02184c1.pdf [file c4tc02184c1.pdf]

**Electronic Supplementary Material (ESI) for Journal of Materials  
Chemistry C.**

**This journal is © The Royal Society of Chemistry 2014**

**Supporting Information**

**Tunable crystallographic grain orientation and Raman  
fingerprint of polycrystalline SnO thin films**

**Quan Liu, Lingyan Liang\*, Hongtao Cao\*, Hao Luo, Hongliang Zhang, Jun Li,  
Xiuxia Li, Fuling Deng**

Quan Liu, Prof. Lingyan Liang, Prof. Hongtao Cao, Hao Luo, Prof. Hongliang Zhang,  
Jun Li, Xiuxia Li, Fuling Deng

Division of Functional Materials and Nano Devices, Ningbo Institute of Material  
Technology and Engineering, Chinese Academy of Sciences, Ningbo 315201,  
People's Republic of China

E-mail: lly@nimte.ac.cn (L. Y. Liang) & h\_cao@nimte.ac.cn (H. T. Cao)

Quan Liu

Faculty of Materials Science and Chemical Engineering, Ningbo University, Ningbo  
315211, People's Republic of China

## S1. XRD patterns of bare SnO films of different thickness

The films with the thickness below 60 nm exhibit a (001) peak located at  $\sim 18.4^\circ$  and a (002) peak located at  $\sim 37.3^\circ$ , respectively. With increasing the thickness of SnO film, a (101) peak located at  $\sim 30.0^\circ$  is present, while the (001) and (002) peaks are suppressed. Especially, the (101) peak is dominant and the (001)-orientated peaks are weak when the SnO thickness is above 100 nm.

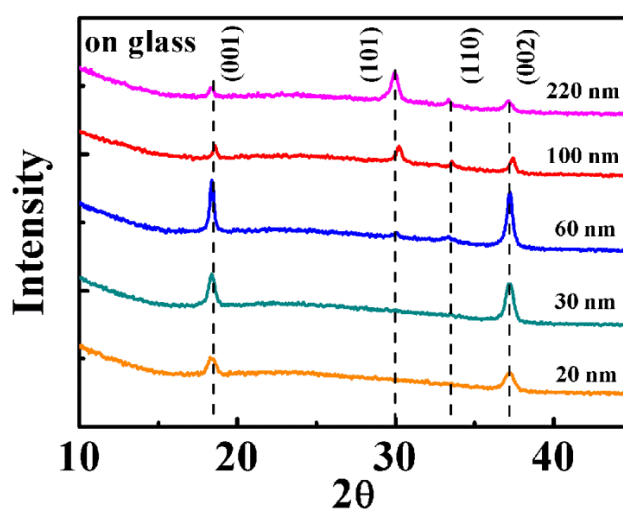

Figure S1. XRD patterns of bare SnO films of different thickness.

## S2. XRD patterns of thick SnO films with $\text{Al}_2\text{O}_3$ capping layer of different thickness

With increasing  $t_{\text{Al}_2\text{O}_3}$ , the (001) and (002) peaks are suppressed and the (101) peak is enhanced.

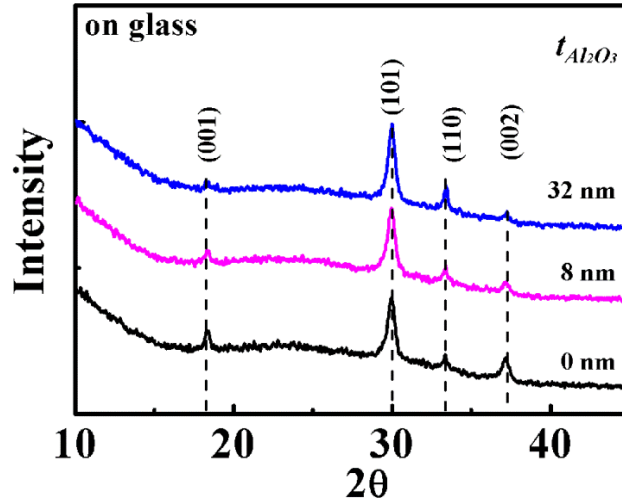

Figure S2. XRD patterns of 220 nm-thick SnO films with Al<sub>2</sub>O<sub>3</sub> capping layer of different thickness.

### S3. Raman spectra of the SnO films of different thickness

The Raman spectrum of the thin SnO films (20 nm and 30 nm) shows only one peak located at 210 cm<sup>-1</sup>, in accordance with the (001) preferred orientation measured by the XRD. With the increasing film thickness, the 110 cm<sup>-1</sup> peak intensity increases gradually and is comparable to that of the 210 cm<sup>-1</sup> peak when the SnO thickness is above 100 nm, coupled with the enhancement of the (101) grains.

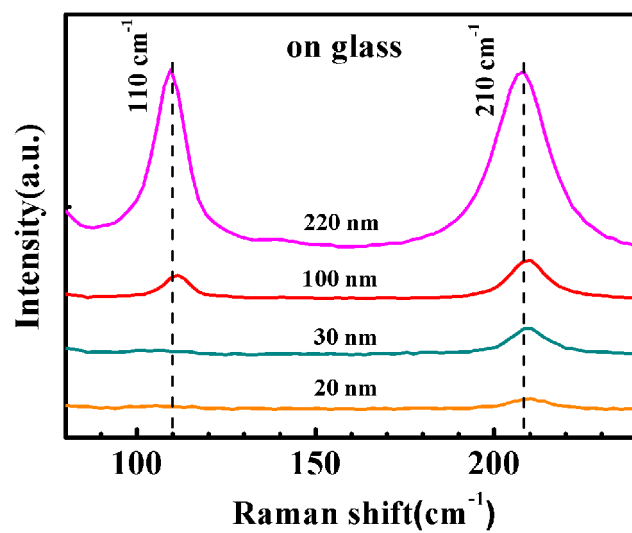

Figure S3. Raman spectra of bare SnO films of different thickness.
